# Supplementary material for: A Li–O2/CO2 battery based on bio-inspired engineering of the Bi2S3/PVP cathode
Source: Royal Society of Chemistry journal article supplement (doi:10.1039/d4tc00143e), 2024-01-01
Supplement: d4tc00143e1.pdf [file d4tc00143e1.pdf]

**Supporting Information for**  
**A Li-O<sub>2</sub>/CO<sub>2</sub> Battery Based on Bio-inspired engineering of**  
**Bi<sub>2</sub>S<sub>3</sub>/PVP cathode**

*Song Gao<sup>a</sup>, Siqu Li<sup>b</sup>, Miao Han<sup>b</sup>, Yuanlong E<sup>b</sup>, Wan-Qiang Liu<sup>c,d</sup>, Hongsheng Jia<sup>b\*</sup> and Fang  
Wang<sup>c,e\*</sup>*

<sup>a</sup> College of Mathematics and Computer, Jilin Normal University, Siping 136000, China

<sup>b</sup> Key Laboratory of Functional Materials Physics and Chemistry of the Ministry of Education, Jilin Normal University, Siping 136000, China

<sup>c</sup> School of Materials Science and Engineering, Changchun University of Science and Technology, Changchun, 130022, China

<sup>d</sup> School of Materials Science and Engineering, Changchun University of Science and Technology, Changchun 130022, P. R. China

<sup>e</sup> Zhongshan Institute of Changchun University of Science and Technology, Huoju Development District, Zhongshan, 528437, China

\*Correspondence to: [jiahs@jlnu.edu.cn](mailto:jiahs@jlnu.edu.cn)

\*Correspondence to: [f-wang-ssi@foxmail.com](mailto:f-wang-ssi@foxmail.com)

## Supplementary Figures

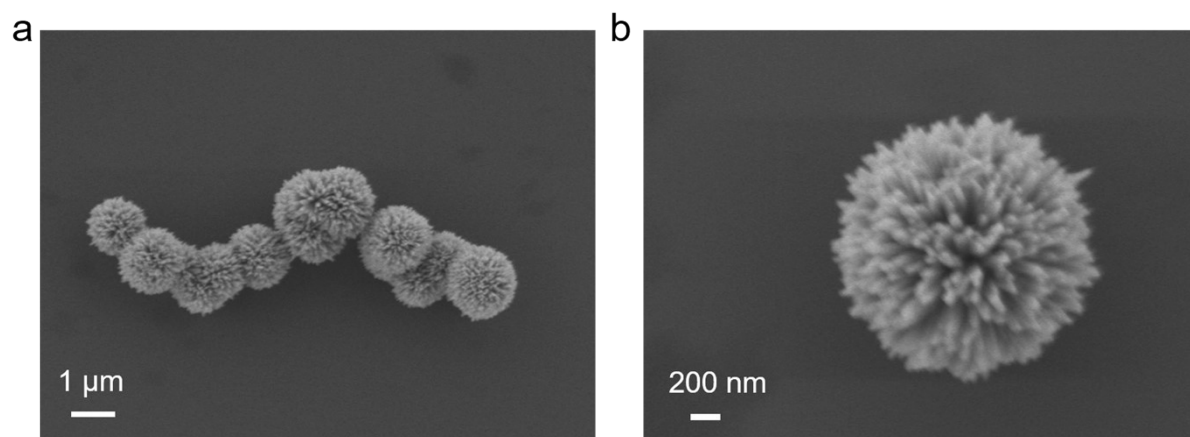

**Figure S1.** (a) and (b) SEM images of  $\text{Bi}_2\text{S}_3$ .

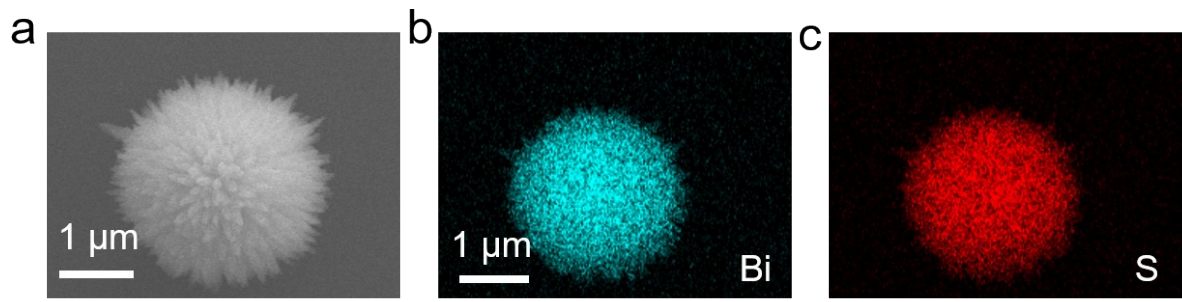

**Figure S2.** (c) and (d)EDS element mapping images of  $\text{Bi}_2\text{S}_3$ .

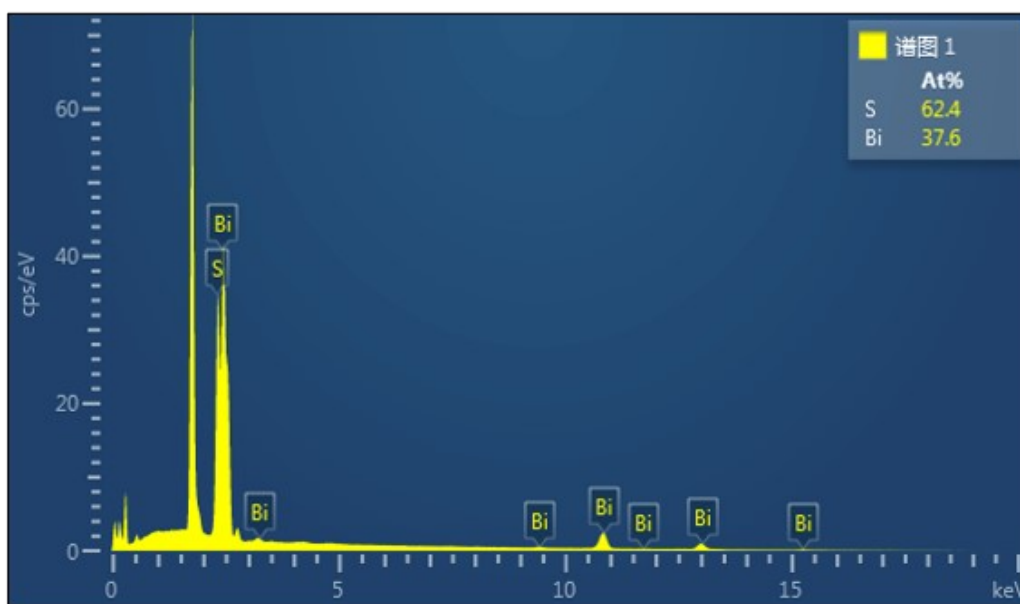

**Figure S3.** The Energy spectrum images of  $\text{Bi}_2\text{S}_3$ .

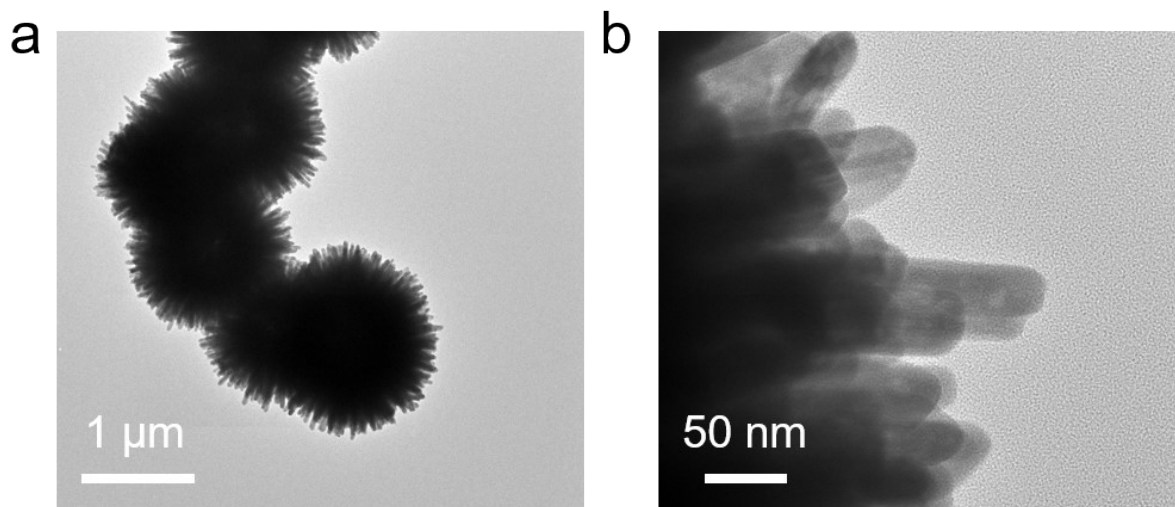

**Figure S4.** (a) and (b) TEM images of  $\text{Bi}_2\text{S}_3$ .

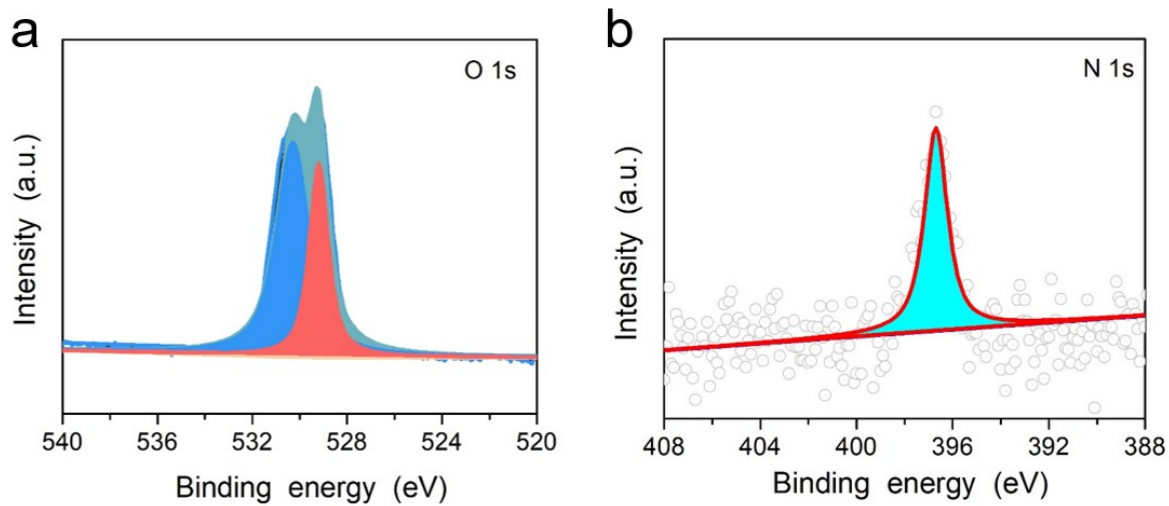

**Figure S5.** (a) and (b) XPS spectras of O 1s, N 1s.

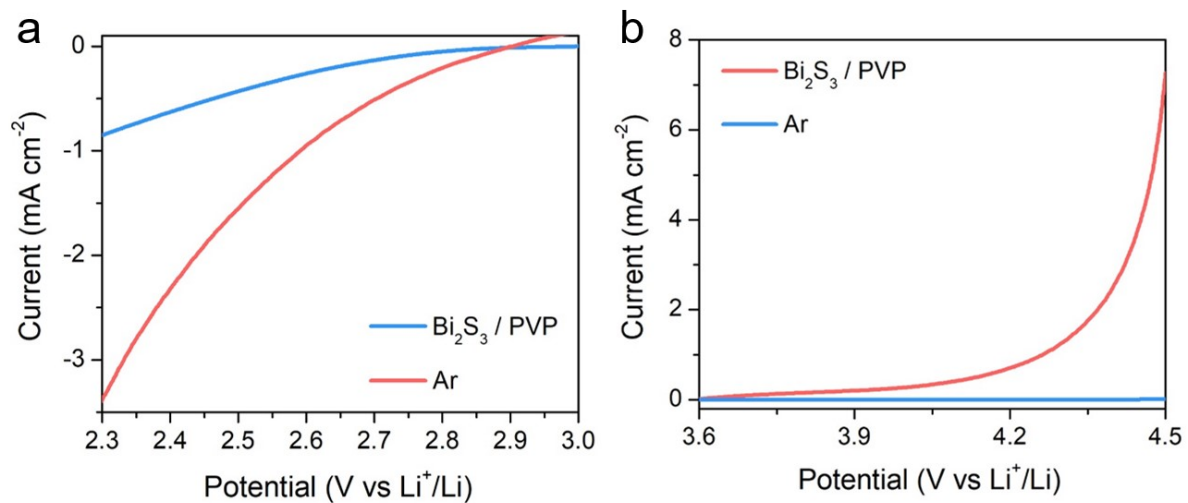

**Figure S6.** LSV curves of (a) ORR and (b) OER process for Bi<sub>2</sub>S<sub>3</sub>/PVP cathode in O<sub>2</sub>/Ar atmosphere at a scan rate of 5 mV s<sup>-1</sup>.

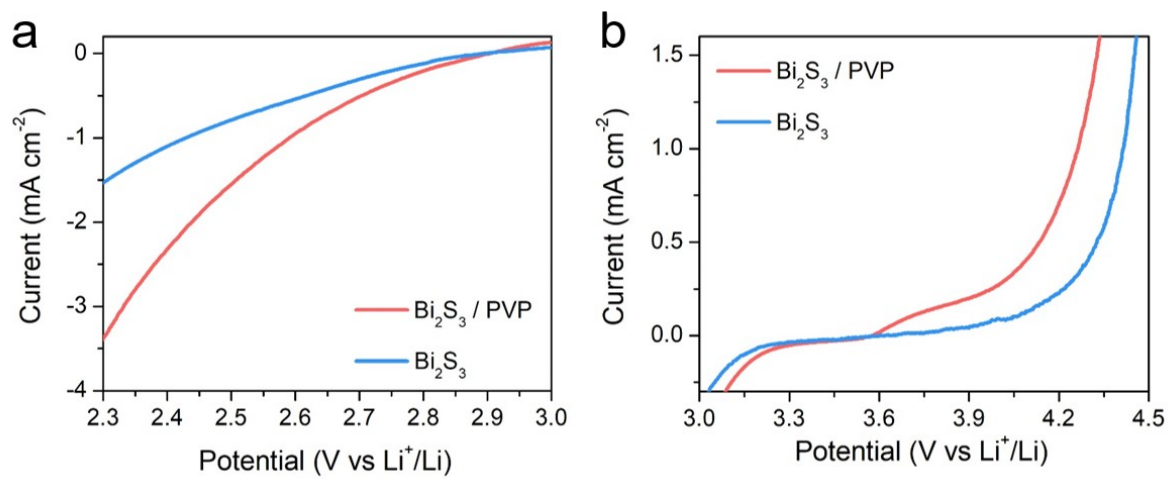

**Figure S7.** LSV curves of (a) ORR and (d) OER process for Bi<sub>2</sub>S<sub>3</sub>/PVP and Bi<sub>2</sub>S<sub>3</sub> cathodes in O<sub>2</sub> atmosphere at a scan rate of 5 mV s<sup>-1</sup>.



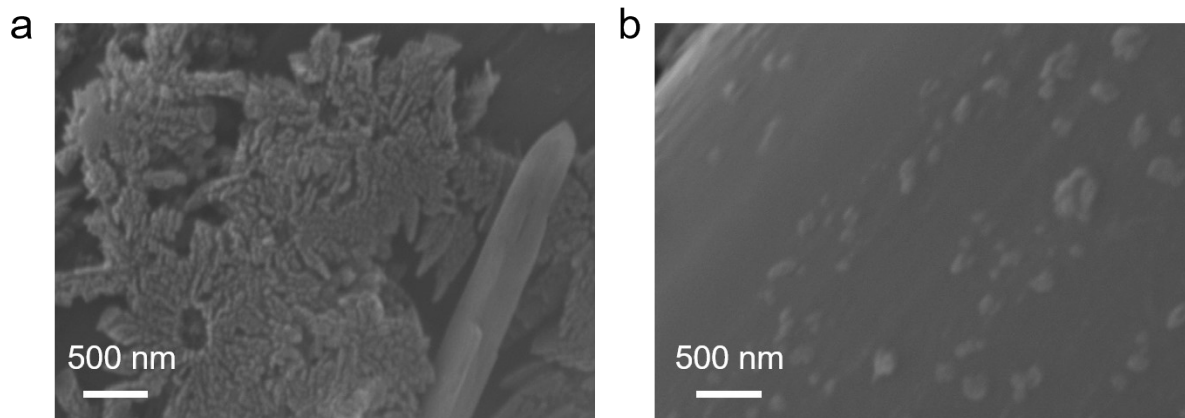

**Figure S8.** (a) and (b) SEM images of the discharged and charged  $\text{Bi}_2\text{S}_3$  cathode.

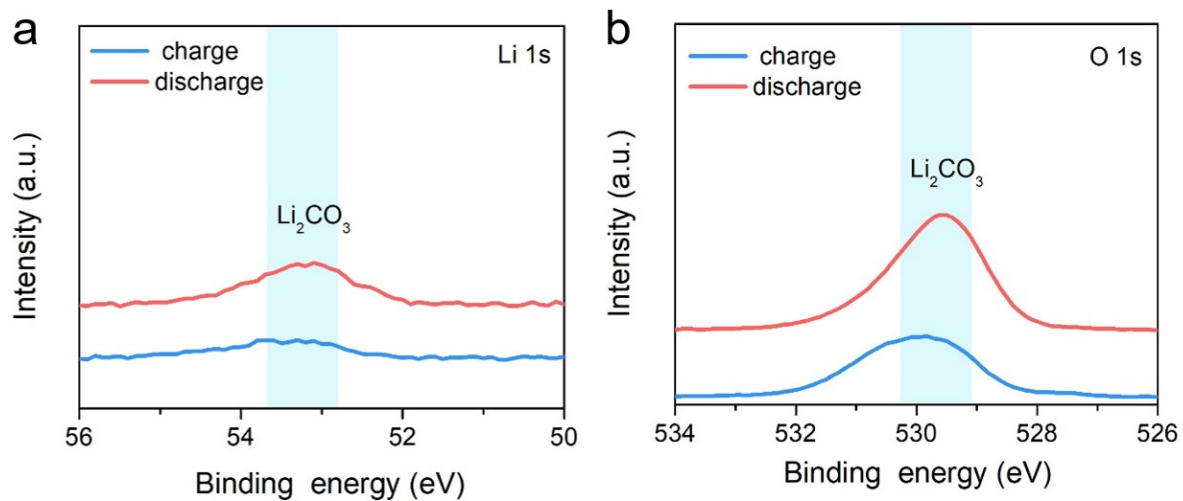

**Figure S9.** XPS spectra of the discharge product of  $\text{Li}_2\text{CO}_3$ .
